# Supplementary material for: High-throughput targeted long-read single cell sequencing reveals the clonal and transcriptional landscape of lymphocytes
Source: PubMed Central journal article supplement (PMC6635368; doi:10.1038/s41467-019-11049-4), 2019-07-16
Supplement: 41467_2019_11049_MOESM1_ESM.pdf [file 41467_2019_11049_MOESM1_ESM.pdf]

# **High-throughput targeted long-read single cell sequencing reveals the clonal and transcriptional landscape of lymphocytes**

Singh et al.

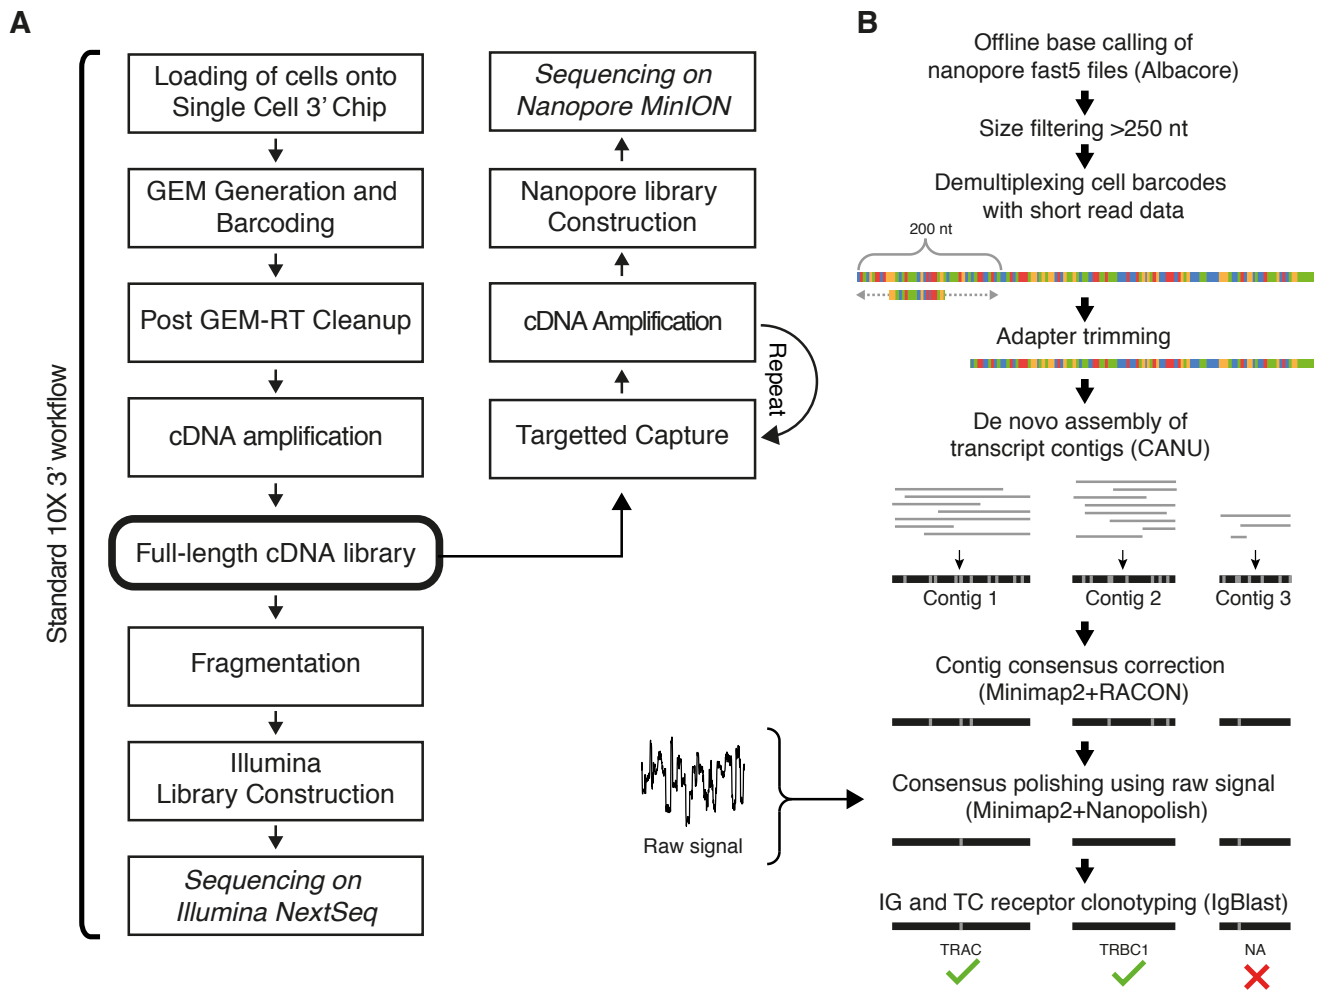

**Supplementary Figure 1.** RAGE-Seq experimental protocol and computational pipeline. **(a)** Detailed experimental workflow of RAGE-Seq. Single-cell suspensions are loaded onto 3' library chips for the Chromium Single Cell 3' Library according to the manufacturer's recommendations (10X Genomics). Single cells are partitioned into Gel Beads in Emulsion (GEMs) with cell lysis and barcoded reverse transcription of RNA. Following isolation of GEMs from the Chromium instrument, full-length cDNA is PCR amplified. At this point the cDNA library is split into two fractions. The first fraction undergoes the remainder of the Chromium workflow which involves shearing, adapter ligation and Illumina sequencing. The second fraction undergoes two rounds of targeted capture of TCR and BCR genes followed by ONT library preparation using the 1D adapter ligation sequencing kit and sequencing on the MinION platform. **(b)** Detailed computational pipeline of RAGE-Seq.

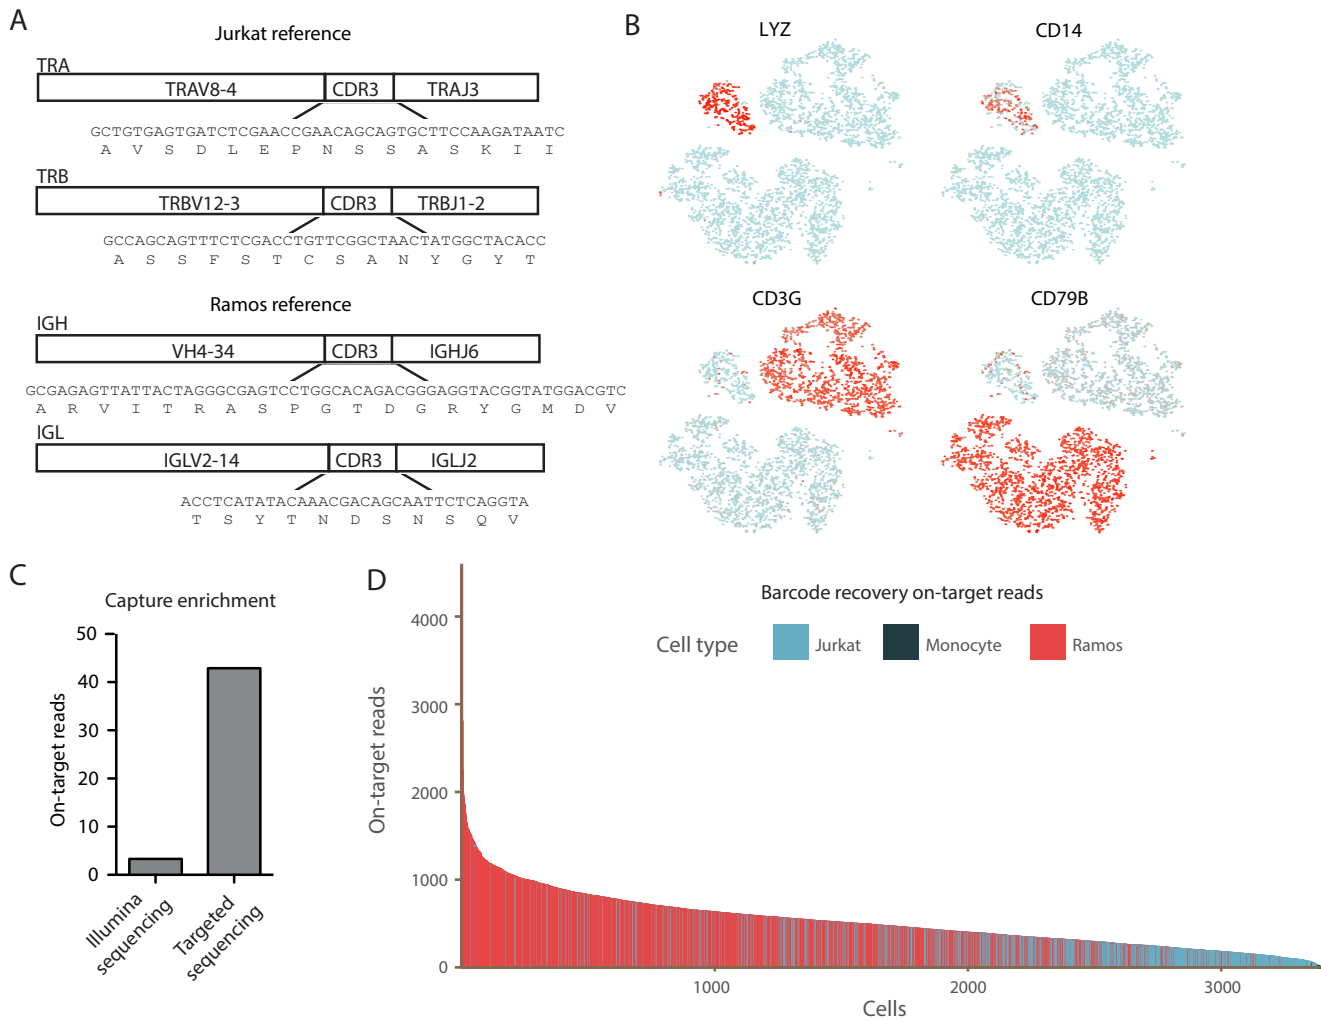

**Supplementary Figure 2.** RAGE-Seq cross-sequencing platform quality control measurements. **(a)** Reference CDR3, V and J gene segments that encode the TCR $\alpha$  and TCR $\beta$  chains of Jurkat or the immunoglobulin heavy and light chains of Ramos. For Ramos the most abundant heavy chain CDR3 (1123/1278 cells) and light chain CDR3 sequences (821/937) were chosen as the reference. **(b)** tSNE analysis of key canonical gene expression markers used to identify the cell type of each cluster. *CD3G* was used to identify Jurkat, *CD79B* was used to identify Ramos and *LYZ* and *CD14* were used to identify monocytes. **(c)** The relative enrichment of targeted capture of antigen receptor genes. On-target reads were determined by the percentage of total Nanopore or Illumina sequencing reads that align to *TRA*, *TRB*, *IGH*, *IGL* and *IGK* constant region genes. **(d)** Nanopore cell barcode recovery for Nanopore reads that are on-target. Mean on-target reads per cell type: Jurkat, 309; Ramos, 646; Monocyte, 1.49. Number of barcodes recovered: Jurkat, 1454/1463; Ramos, 2000/2000; Monocyte, 130/280.

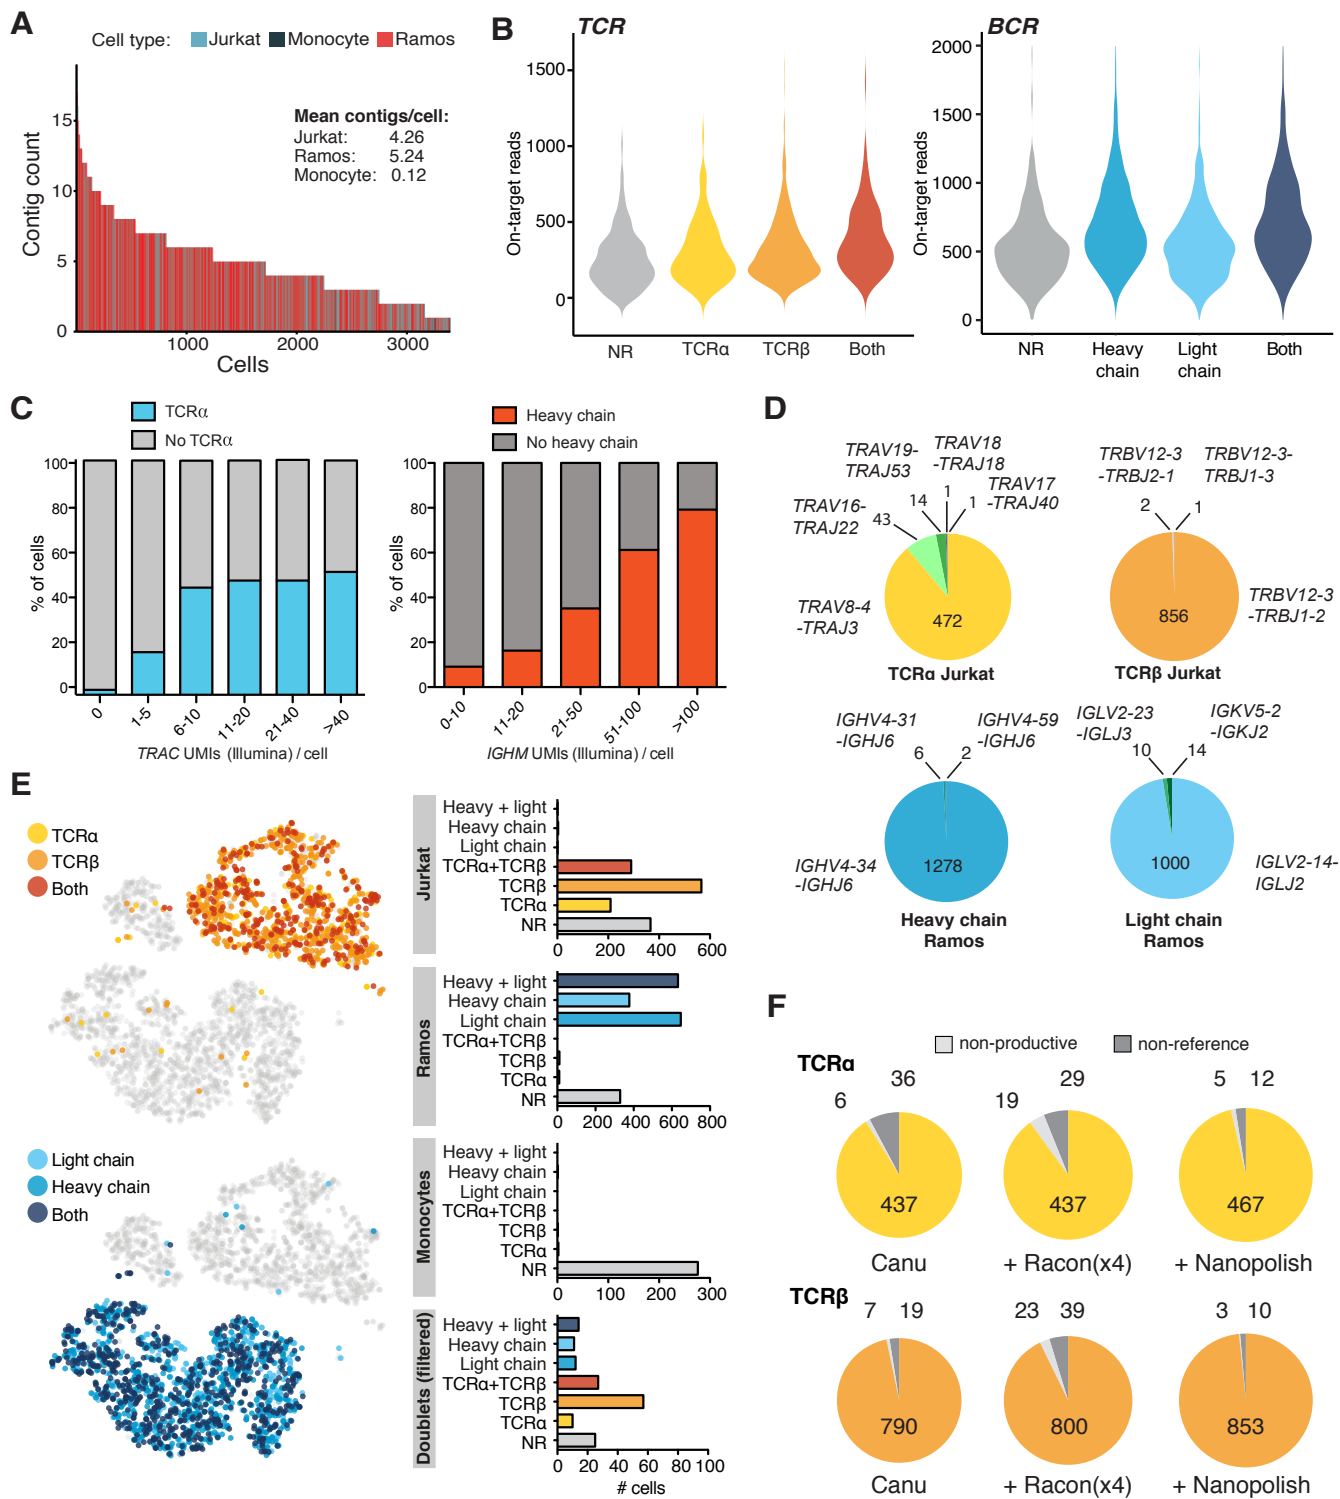



**Supplementary Figure 3.** Quality control measurements of antigen receptor assembly. **(a)** Mean number of contigs assembled per cell following *de novo* assembly and polishing of nanopore reads. Each bar corresponds to an individual cell. Mean number of contigs per cell for each cell type: Jurkat, 4.26; Ramos, 5.24; Monocyte, 0.12. **(b)** The number of on-target nanopore reads for Jurkat (left panel) or Ramos (right panel) grouped by the recovery of TCR chains or BCR chains, respectively. NR, no receptor. Only productive TCR and BCR chains that match their reference V and J gene were assigned. **(c)** The recovery of Jurkat cells assigned a TCR $\alpha$  chain (left panel) or Ramos cells assigned a immunoglobulin heavy chain (right panel) as a function of the number of Illumina *TRAC* (Jurkat) or *IGHM* (Ramos) UMIs per cell. **(d)** Assignment of TCR chains to Jurkat cells or BCR chains to Ramos cells based on their V and J gene segment usage. Shown in each pie graph is the number of cells expressing the designated V and J genes. **(e)** t-SNE plot of Jurkat, Ramos and monocyte cells assigned TCR (top panel) or BCR (bottom panel) chains. Right panels show the total number of cells assigned different chains for each cell type. Doublets (n=136 cells) are not shown on the t-SNE plots and were filtered out based on high gene count (see Methods). **(f)** Accuracy of CDR3 sequences of Jurkat cells at each stage of contig assembly and polishing. Shown are the number of cells assigned a CDR3 sequence that match the reference *TRA* or *TRB* CDR3. ‘Non-reference’ refers to a CDR3 sequence that does not match the reference Jurkat CDR3. ‘Non-productive’ refers to TCR chains with a CDR3 sequence that is out-of-frame or contains stop-codons and are usually filtered from the dataset. Only TCR chains that match the Jurkat reference V and J gene segments are assigned.

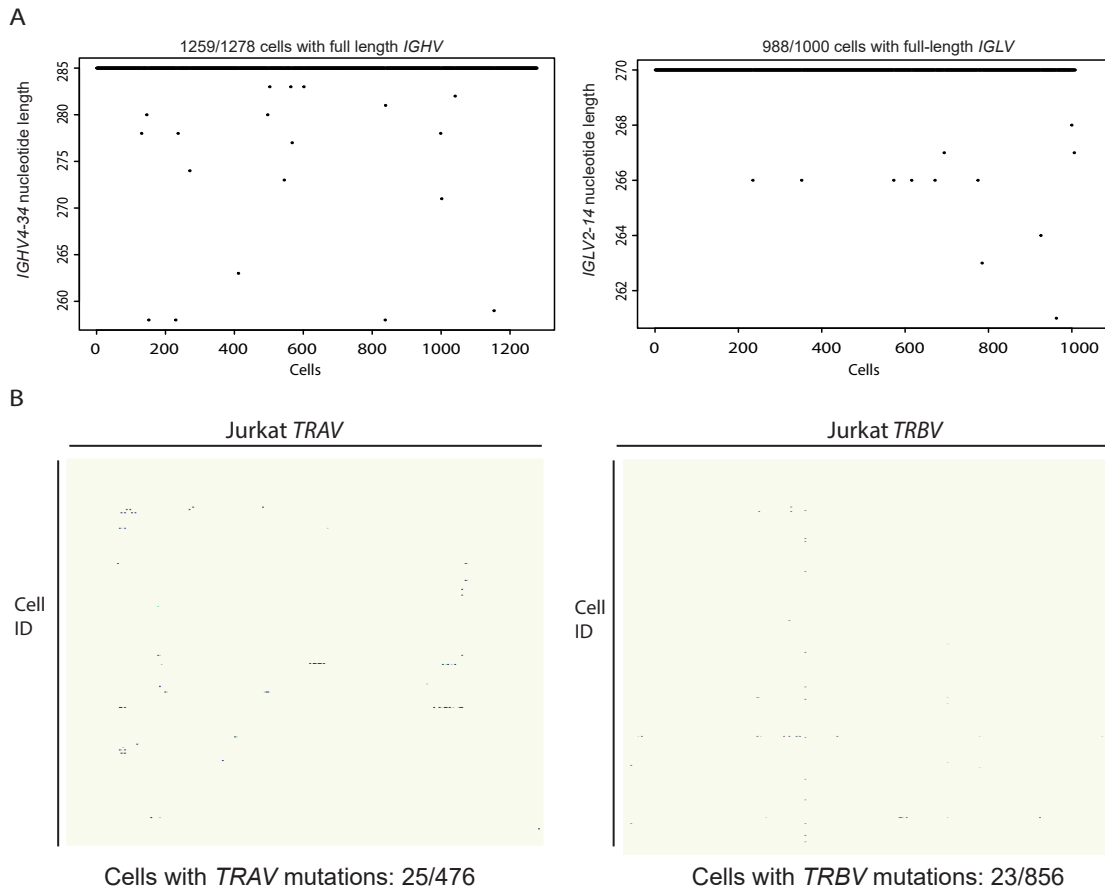

**Supplementary Figure 4.** Quality control measurements of calling somatic hypermutation in individual cells. **(a)** Nucleotide length of Ramos heavy chain (left panel) and light chain (right panel) V regions for each individual Ramos cell. The number of cells with the maximum length of the entire *IGHV4-34* (left) or *IGLV2-14* (right) gene is indicated. **(b)** Heatmap of the V regions of individual Jurkat cells encoding the TCR $\alpha$  (left panel, n=476) and TCR $\beta$  (right panel, n=856) chain. Each row represents an individual cell and each column a nucleotide position in the respective V gene. Light blue represents synonymous nucleotide substitutions while dark blue represents non-synonymous nucleotide substitutions, when compared to germline *TRAV8-4* and *TRBV12-3* sequences. Length of Jurkat *TRAV8-4*: 274 nt; length of Jurkat *TRBV12-3*: 276 nt.

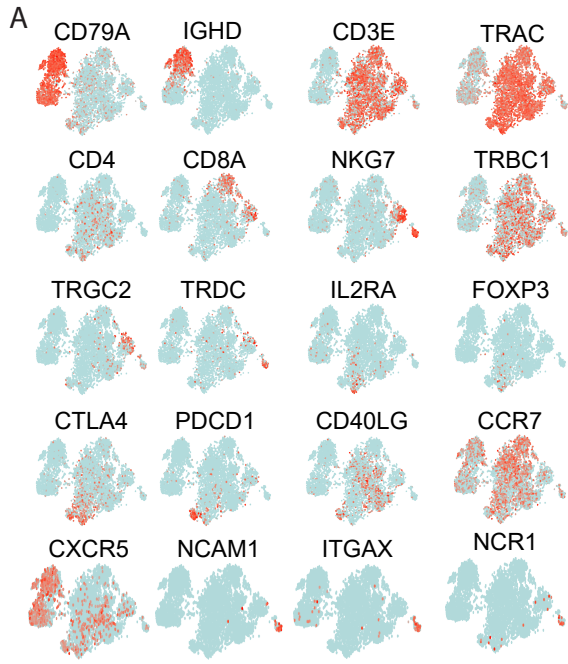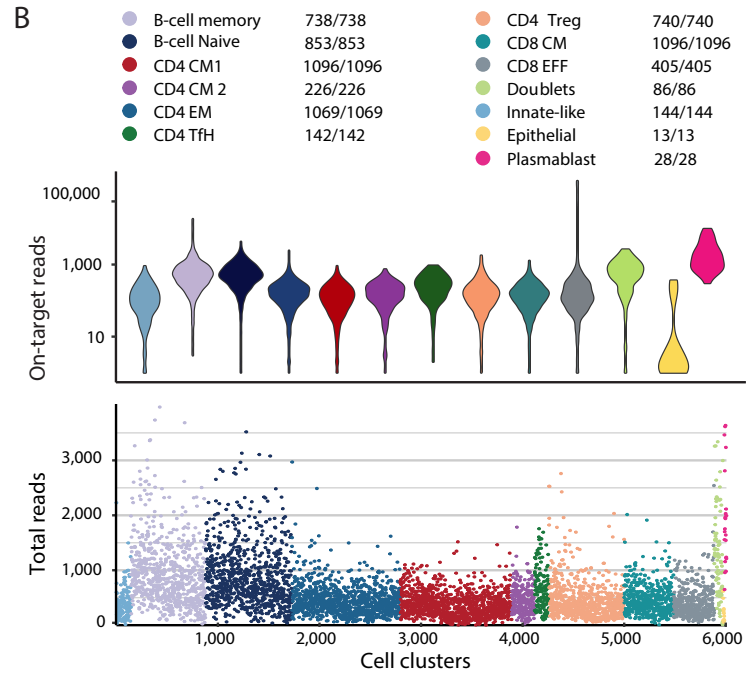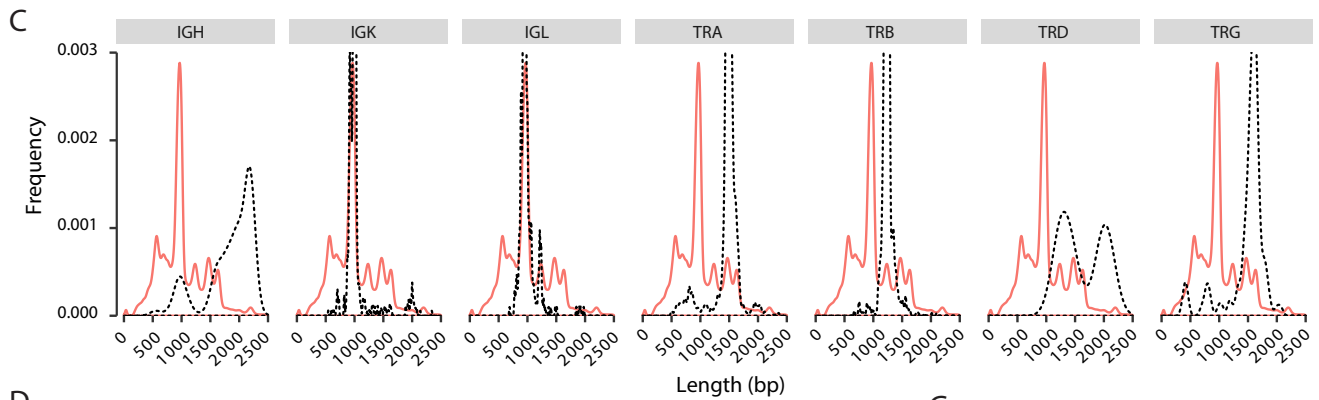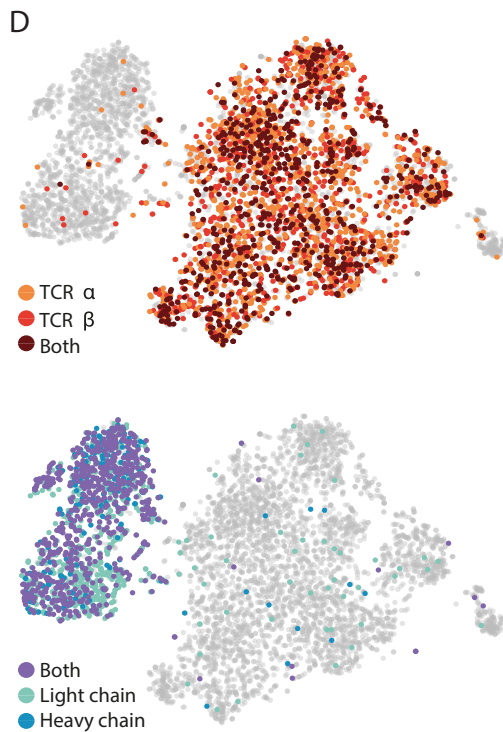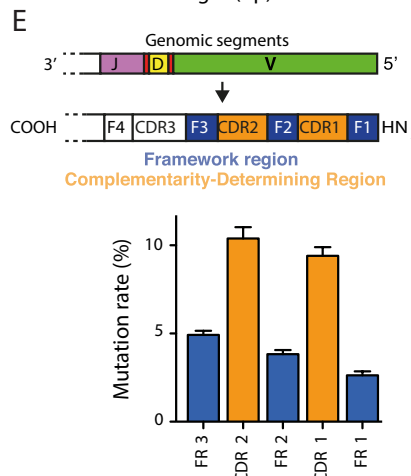

**F**

**TCR $\alpha$ :** 10 cells  
*TRAV1-2, TRAJ33*  
*CDR3: VPMSDNYQLI*

**TCR $\beta$ :** 2 cells  
*TRBV6-4, TRBJ2-6*  
*CDR3: ASSDSRGSANVLT*

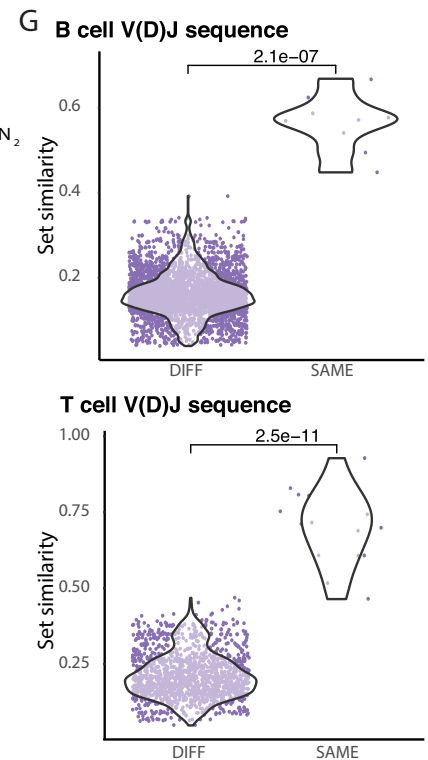

**Supplementary Figure 5.** Additional measurements of RAGE-seq on a human lymph node. **(a)** t-SNE analysis of key canonical gene expression markers used to identify cell type for each cluster. Briefly, CD4 CM 1: *CD4+ CD8A- CCR7+*, CD4 EM: *CD4+ CD8A- CCR7-*, B-cell naïve: *CD79A+ IGHD+ IGHG1- IGHGA-*, B-cell memory: *CD79A+, IGHD- IGHA1+ IGHG1+*, CD4 Treg: *CD4+ FOXP3+ IL2RA+ CTLA4+*, CD4 Tfh: *CD4+ CXCR5+ PDCD1+ CD40LG+ ILR2RA- FOXP3-*, Epithelial: *EPCAM+* (not shown), Doublet: *CD3E+ CD79A+ TRAC+ IGHD+ IGHM+* Plasmablast: *CD79A+ (JCHAIN+* not shown), CD8 CM: *CD8A+ CD4- CCR7+*, CD8 EFF: *CD8A+ CD4- CCR7- (GZMA/B/K+ GNLY+* not shown), CD4 CM 2: *CD4+ CD8- CCR7+*, Innate-like: *CD3E+ NKG7+ TRDC+ NCRI+ NCAM1+*. **(b)** The number of on-target nanopore reads for each cell population identified in the lymph node (top panel) and the recovery of cell barcodes for each cell within each cell population (bottom panel). The number of barcodes recovered is shown above the top panel. **(c)** The nucleotide length for assembled antigen receptor transcripts for each receptor chain identified across all cells in the lymph node. The overall nanopore sequencing read length distribution is shown as solid and the assembled contigs as dashed lines. **(d)** t-SNE plot of the assignment of TCR (top panel) and BCR (bottom panel) chains for each cell in the lymph node. **(e)** Mutation rate of the framework and complementarity regions of the heavy chain V regions that have been assigned to memory B cells. **(f)** TCR $\alpha$  and TCR $\beta$  chain sequence of T cells assigned MAIT-associated TCRs. **(g)** Jaccard set similarity score of top 250 raw UMI gene counts across all B cells (top) and T cells (bottom) with shared (SAME) V(D)J sequences and those with dissimilar (DIFF) V(D)J sequences within each respective cell type cluster. Only cells assigned paired TCR or paired BCR chains were analyzed. Significance was calculated via the corrected Wilcoxon test.

A

- CD4 EFF
- CD8 EFF 1
- Cancer associated fibroblast
- CD4 CM
- Epithelial 2
- Myeloid
- Pericyte
- CD8 EFF 2
- B-cell naive
- CD4 Treg
- Epithelial 1
- Endothelial
- B-cell memory
- Innate-like
- Plasmablast

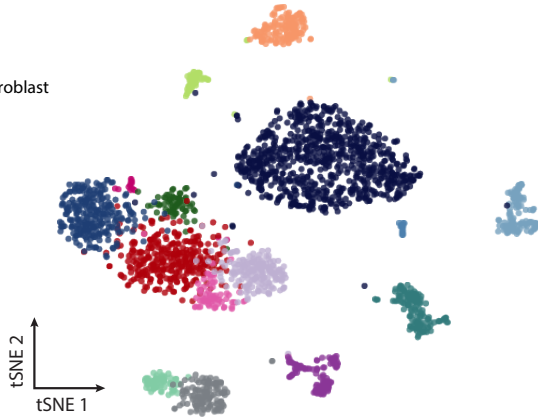

B

- No productive antigen receptor chain detected
- Light + heavy
- Light chain
- Heavy chain
- TCRα+TCRβ
- TCRβ
- TCRα

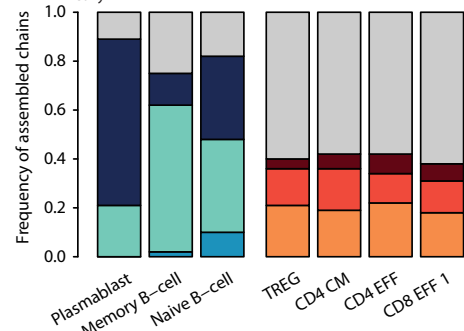

C

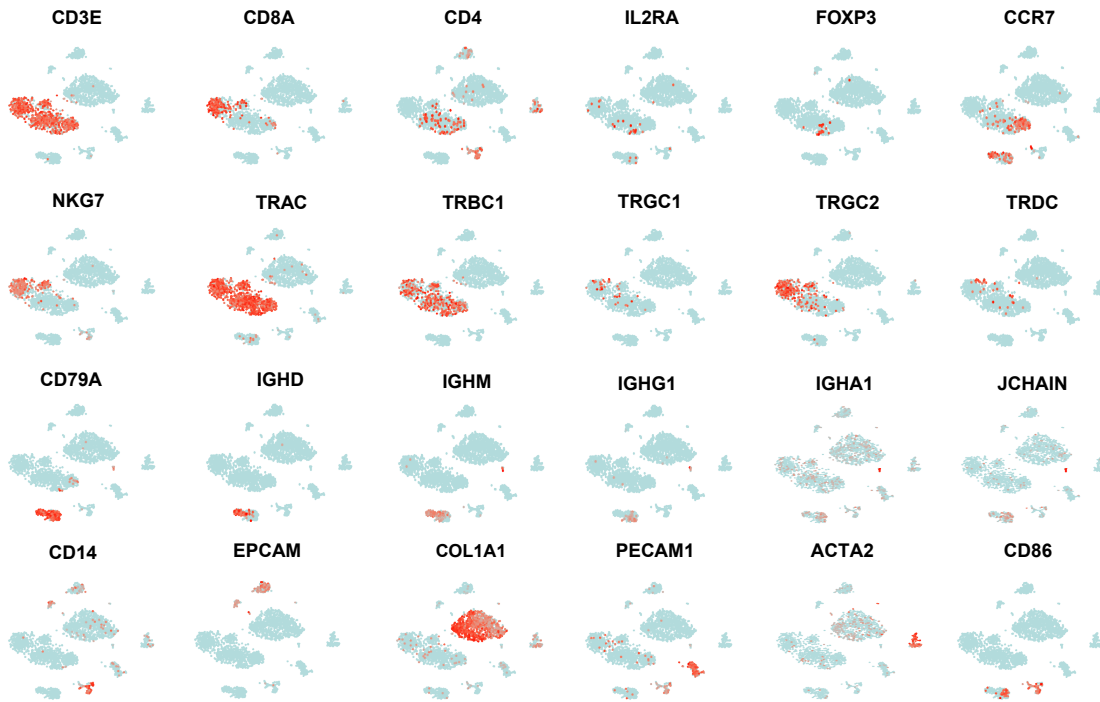

D

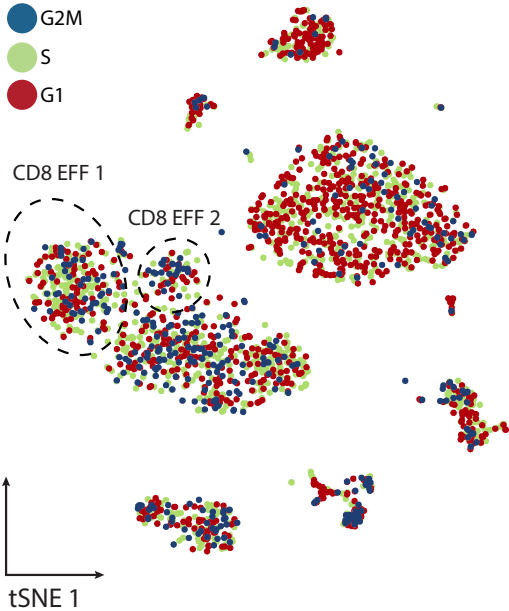

E

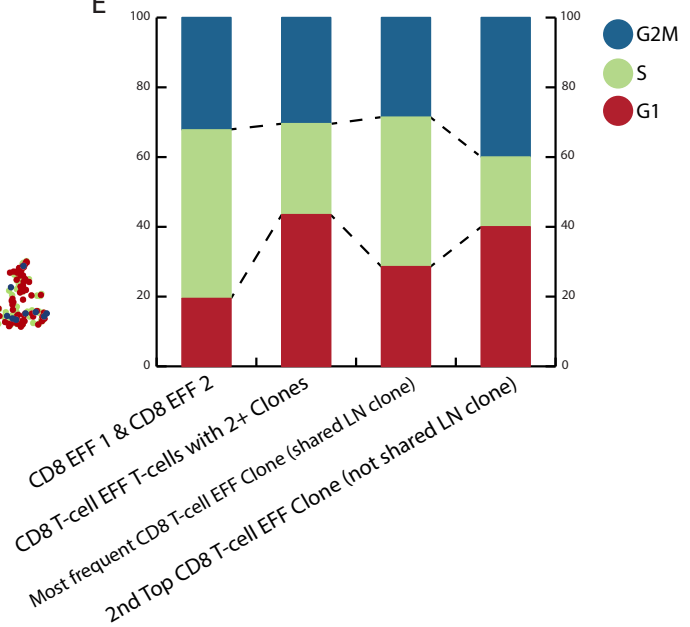

**Supplementary Figure 6.** Additional measurements of RAGE-seq on a tumour. **(a)** t-SNE analysis of 2,493 cells from a breast cancer tumor generated from short-read sequencing data. Number of cells: B-cell memory, 128; B-cell naïve, 68; cancer associated fibroblast, 773; CD4 CM; CD4 Treg, 67; CD4 CM, 323; CD4 EFF, 173; CD8 EFF 1, 257; CD8 EFF 2, 72; Endothelial, 144; Epithelial 1, 144; Epithelial 2, 57. Innate-like, 16; Myeloid, 113; Pericyte, 138; Plasmablast, 19. **(b)** Assignment of TCR chains to each T population and BCR chains to each B cell population identified in (a). **(c)** t-SNE plots of key canonical gene expression markers used to identify cell types in (a). Briefly, CD4 EFF: *CD4+ CD8- CCR7-*, CD8 EFF 1: *CD8+ CD4- CCR7- TRAC+* (*GNLY+ GZMB+*, not shown), Cancer associated fibroblast: *COL1A1+*, CD4 CM: *CD4+ CD8- CCR7+*, Epithelial 2: *EPCAM+*, Myeloid: *CD14+ CD86+*, Pericyte: *ACTA2+*, CD8 EFF 2: *CD8+ CD4- TRAC+ CCR7-* (*GZMA+ GZMK+*, not shown), B-cell Naïve: *CD79+*, *IGHD+*, *IGHG1- IGHA1-*, CD4 Treg: *CD4+ FOXP3+ IL2RA+*, Epithelial 1: *EPCAM+*, Endothelial 1: *PECAMI*, B-cell memory: *CD79A+*, *IGHD- IGHA1+ IGHG1+*, Innate-like: *CD3E+ TRDC+*, Plasmablast: *CD79A+*, *JCHAIN+*. **(d)** t-SNE analysis of cell cycle phase (G1, G2M or S) of all cells identified in the tumor. **(e)** Proportion of cell cycle phase of all cells identified within the tumor CD8 T-cell EFF clusters and the top two expanded CD8 T-cell EFF clones. Expanded clones were measured by the frequency of shared TCR $\beta$  V(D)J sequences. CD8 EFF 1 CD8 EFF 2 (n=329). T-cells with 2+ clones (n=23). Most frequent CD8 clone: V: *TRBV7-9* J: *TRBJ2-3*, CDR3: *ASSLAGRVPGDTQY* (n=7) and second top CD8 clone: *TRBV7-9 TRBJ2-2*, *ASSLELTGELF* (n=5).

# A

## Ramos / Jurkat / PBMC

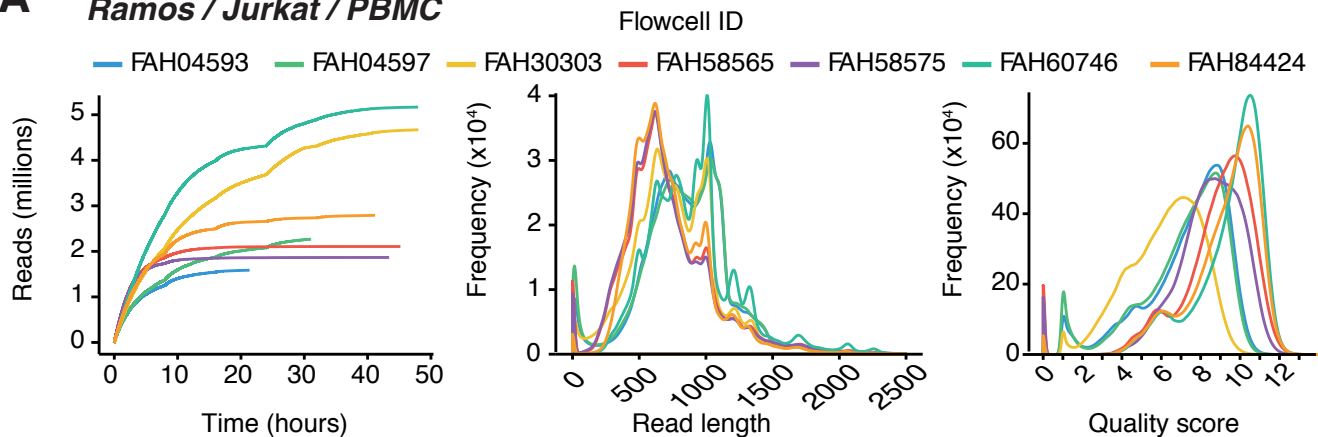

## Tumour

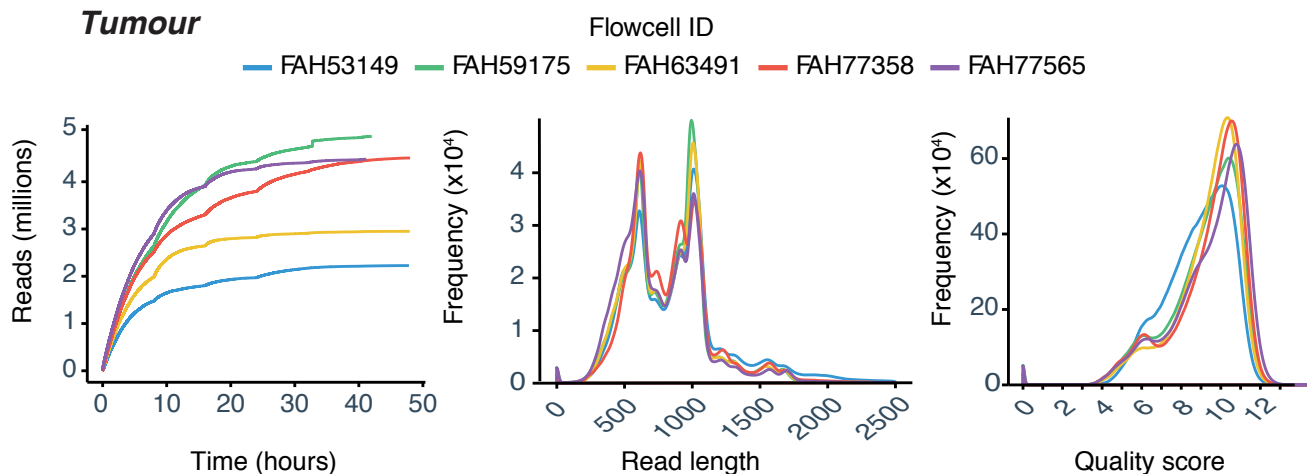

## Lymph node

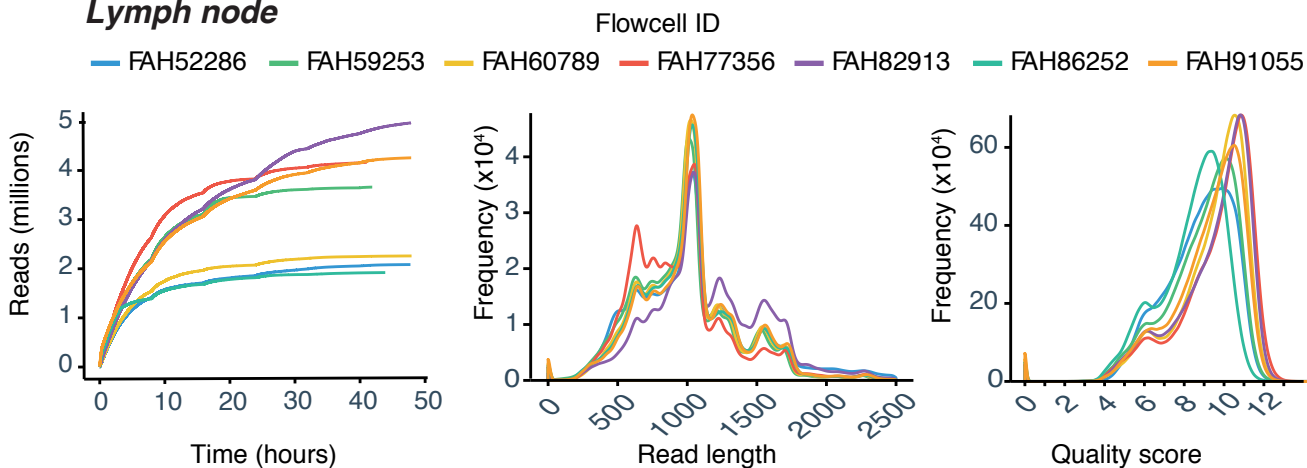

# B

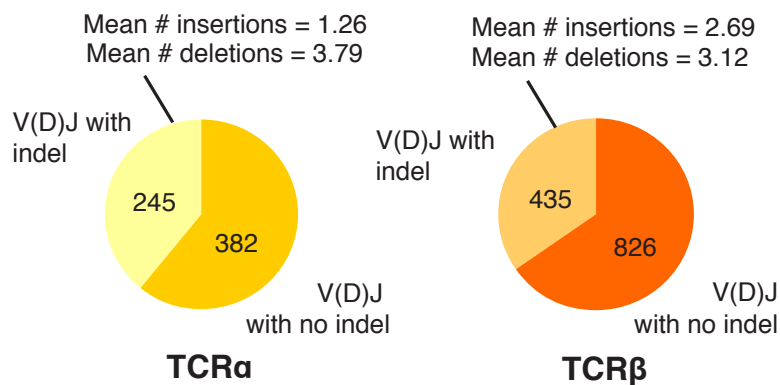

# C

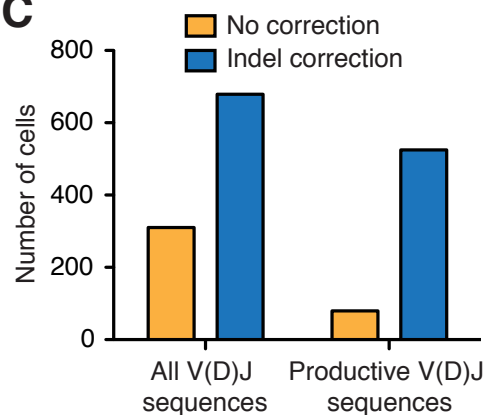

**Supplementary Figure 7.** Nanopore sequencing statistics and indel correction. **(a)** Number of reads, read length and quality score for cell line, tumour and lymph node samples. Color denotes each flowcell the run was performed on (R9.4 or R9.5 chemistry). **(b)** The total number of TCR chains assigned to Jurkat cells (n=1463) that carry indels in their *TRAV* or *TRBV* gene before indel correction (see Methods). TCR chains include those with non-productive CDR3 sequences. **(c)** The effect of indel correction on antigen receptor chain recovery. Shown are all productive BCR and TCR chains recovered across the cell line experiment (all Jurkat, Ramos and monocyte cells). 'All V(D)J sequences' refers to both productive and non-productive antigen receptor sequences.



**Supplementary Table 1.** Number of on-target nanopore reads post sequence capture.

|            | Total read count | On-target         | Demultiplexed reads | Demux. On-target |
|------------|------------------|-------------------|---------------------|------------------|
| Cell lines | 20,346,396       | 8,715,631(42.8%)  | 3,805,076(18.7%)    | 1,915,352(50.3%) |
| Lymph Node | 23,044,761       | 12,560,425(54.5%) | 3,380,621(14.7%)    | 1,989,680(58.9%) |
| Tumour     | 16,601,436       | 8,611,279(51.9%)  | 3,069,468(18.5%)    | 1,899,447(61.9%) |

**Supplementary Table 2.** Percentage of Illumina reads assigned to the final cell barcode lists.

|                          | Ramos       | Lymph Node  | Tumor       |
|--------------------------|-------------|-------------|-------------|
| Total Illumina reads     | 690,512,282 | 309,532,978 | 107,790,387 |
| Final cell barcodes list | 532,968,514 | 171,613,482 | 65,527,299  |
| Percentage of total      | 77.2        | 55.4        | 60.8        |

**Supplementary Table 3.** Comparison of RAGE-Seq against SmartSeq2.

|                       | #Jurkat cells | TRA recovery | TRB Recovery | Paired | Cost/Cell (AUD) |
|-----------------------|---------------|--------------|--------------|--------|-----------------|
| RAGE-Seq              | 1463          | 472          | 856          | 277    | \$3.70          |
| SmartSeq + VDJ-Puzzle | 28            | 22           | 25           | 21     | \$90.92         |

**Supplementary Table 4.** Cost-breakdown of RAGE-Seq and Smart-Seq2.<sup>1</sup>

| Items                                                                            | Supplier        | Cost per experiment (AUD) | Cost per cell (AUD) |
|----------------------------------------------------------------------------------|-----------------|---------------------------|---------------------|
| RAGE-seq                                                                         |                 |                           |                     |
| Capture probes (NimbleGen)                                                       | Roche           | \$1173                    | \$0.31              |
| SeqCap EZ accessory kit                                                          | Roche           | \$46                      | \$0.013             |
| Hybridisation and wash kit                                                       | Roche           | \$19.8                    | \$0.0053            |
| KAPA Hotstart HiFi ReadyMix                                                      | Kapa Biosystems | \$12.2                    | \$0.0031            |
| Dynabeads M-270 Streptavidin                                                     | ThermoFisher    | \$65.53                   | \$0.018             |
| AMPure XP magnetic beads                                                         | Agencourt       | \$20.5                    | \$0.0055            |
| 10X Chromium capture and library preparation                                     | 10X Genomics    | \$2776.50                 | \$0.74              |
| MinION library prep and sequencing (x7)                                          | Oxford Nanopore | \$6125                    | \$1.64              |
| NextSeq 500/550 Mid Output v2 kit (150 cycles)                                   | Illumina        | \$1339.50                 | \$0.36              |
| NextSeq 500/550 High Output v2 kit (150 cycles)                                  | Illumina        | \$3522                    | \$0.94              |
| Smart-Seq2                                                                       |                 |                           |                     |
| Recombinant RNase Inhibitor                                                      | Clontech        |                           | \$2.04              |
| SuperScript II Reverse Transcriptase                                             | Invitrogen      |                           | \$3.48              |
| KAPA Hotstart HiFi ReadyMix                                                      | Kapa Biosystems |                           | \$1.22              |
| Nextera XT Index Kit                                                             | Illumina        |                           | \$3.15              |
| Nextera XT DNA Library Prep Kit                                                  | Illumina        |                           | \$39.0              |
| AMPure XP magnetic beads                                                         | Agencourt       |                           | \$1.75              |
| LabChip GX Touch 24                                                              | PerkinElmer     |                           | \$1.50              |
| PicoGreen                                                                        | ThermoFisher    |                           | \$0.82              |
| dNTP Mix                                                                         | ThermoFisher    |                           | \$0.14              |
| Oligonucleotides                                                                 | Exiqon          |                           | \$3.40              |
| NextSeq 500/550 High Output v2 kit (300 cycles) ~ 2.5x10 <sup>6</sup> reads/cell | Illumina        |                           | \$35.28             |

<sup>1</sup> RAGE-Seq had 3,743 cells in the final dataset. Costs were calculated for the cell line experiment for RAGE-Seq and for 28 Jurkat cells for Smart-Seq2. The cost per experiment for Smart-Seq2 cannot be calculated in the same way as RAGE-Seq because the user can choose the exact number of cells to be sequenced using Smart-Seq2.

**Supplementary Table 5.** Assignment of TCR $\alpha$  and TCR $\beta$  chains to cells assigned TCR $\gamma$  and/or TCR $\delta$  chains.

| Assigned chain (number of cells) | TCR $\alpha$ | TCR $\beta$ | TCR $\alpha\beta$ |
|----------------------------------|--------------|-------------|-------------------|
| TCR $\gamma$ only (14)           | 1            | 1           | 0                 |
| TCR $\delta$ only (84)           | 16           | 12          | 5                 |
| TCR $\gamma$ + TCR $\delta$ (11) | 0            | 0           | 0                 |

**Supplementary Table 6.** Comparison to other droplet-based scRNA-Seq platforms<sup>2</sup>

|                                                 | RAGE-Seq                  | 10X 5' V(D)J              | DART-Seq               | SciSOor-Seq           |
|-------------------------------------------------|---------------------------|---------------------------|------------------------|-----------------------|
| Description                                     | Transcriptome<br>+TCR+BCR | Transcriptome<br>+TCR/BCR | Transcriptome<br>+ BCR | Transcriptome<br>only |
| Throughput                                      | > 10 <sup>4</sup>         | > 10 <sup>4</sup>         | > 10 <sup>4</sup>      | > 10 <sup>4</sup>     |
| Estimated cost/cell (AUD)                       | \$2.50                    | \$1.60                    | N/A                    | \$6.30                |
| Full-length mRNA                                | Yes                       | No                        | NA                     | Yes                   |
| Reports antigen receptors                       | Yes                       | Yes                       | Yes                    | No                    |
| Paired TCR recovery (%)                         | 16.9                      | 55.1                      | N/A                    | N/A                   |
| Paired BCR recovery (%)                         | 42.6                      | 59.1                      | 20.1                   | N/A                   |
| Reports TCR $\gamma\delta$                      | Yes                       | No                        | No                     | No                    |
| Reports BCR<br>somatic hypermutation            | Yes                       | No                        | No                     | N/A                   |
| Reports if BCR is secreted<br>or membrane-bound | Yes                       | No                        | No                     | N/A                   |

<sup>2</sup> 10X V(D)J data was obtained from: <https://support.10xgenomics.com/single-cell-vdj/datasets> (TCR and Ig enrichment from PBMCs of a healthy donor). Costs are estimated for sequencing 5,000 T or B cells using a single 10X capture. Sequencing costs are estimated using the NextSeq platform. The lymph node sample was used to calculate the costs for RAGE-Seq. Cost per cell is lower than reported in Supplementary Table 4 for RAGE-Seq because more cells were sequenced for the lymph node sample than the cell line sample.

**Supplementary Table 7.** Targeted gene segments.

|           |           |             |           |           |            |
|-----------|-----------|-------------|-----------|-----------|------------|
| IGHA1     | IGHA2     | IGHD        | IGHE      | IGHG1     | IGHG2      |
| IGHG3     | IGHG4     | IGHJ1       | IGHJ2     | IGHJ3     | IGHJ4      |
| IGHJ5     | IGHJ6     | IGHM        | IGHV1-18  | IGHV1-2   | IGHV1-24   |
| IGHV1-3   | IGHV1-45  | IGHV1-46    | IGHV1-58  | IGHV1-69  | IGHV1-69-2 |
| IGHV2-26  | IGHV2-5   | IGHV2-70    | IGHV3-11  | IGHV3-13  | IGHV3-15   |
| IGHV3-16  | IGHV3-20  | IGHV3-21    | IGHV3-23  | IGHV3-30  | IGHV3-33   |
| IGHV3-35  | IGHV3-38  | IGHV3-43    | IGHV3-48  | IGHV3-49  | IGHV3-53   |
| IGHV3-64  | IGHV3-66  | IGHV3-7     | IGHV3-72  | IGHV3-73  | IGHV3-74   |
| IGHV4-28  | IGHV4-31  | IGHV4-34G17 | IGHV4-39  | IGHV4-4   | IGHV4-59   |
| IGHV4-61  | IGHV5-51  | IGHV6-1     | IGHV7-81  | IGKC      | IGKJ1      |
| IGKJ2     | IGKJ3     | IGKJ4       | IGKJ5     | IGKV1-12  | IGKV1-16   |
| IGKV1-17  | IGKV1-27  | IGKV1-33    | IGKV1-37  | IGKV1-39  | IGKV1-5    |
| IGKV1-6   | IGKV1-8   | IGKV1-9     | IGKV1D-12 | IGKV1D-13 | IGKV1D-16  |
| IGKV1D-17 | IGKV1D-33 | IGKV1D-37   | IGKV1D-39 | IGKV1D-42 | IGKV1D-43  |
| IGKV1D-8  | IGKV2-24  | IGKV2-28    | IGKV2-30  | IGKV2-40  | IGKV2D-24  |
| IGKV2D-26 | IGKV2D-28 | IGKV2D-29   | IGKV2D-30 | IGKV2D-40 | IGKV3-11   |
| IGKV3-15  | IGKV3-20  | IGKV3-7     | IGKV3D-11 | IGKV3D-15 | IGKV3D-20  |
| IGKV3D-7  | IGKV4-1   | IGKV5-2     | IGKV6-21  | IGKV6D-21 | IGKV6D-41  |
| IGLC1     | IGLC2     | IGLC3       | IGLC7     | IGLJ1     | IGLJ2      |
| IGLJ3     | IGLJ4     | IGLJ5       | IGLJ6     | IGLJ7     | IGLV1-36   |
| IGLV1-40  | IGLV1-44  | IGLV1-47    | IGLV1-50  | IGLV1-51  | IGLV10-54  |
| IGLV11-55 | IGLV2-11  | IGLV2-14    | IGLV2-18  | IGLV2-23  | IGLV2-33   |
| IGLV2-8   | IGLV3-1   | IGLV3-10    | IGLV3-12  | IGLV3-16  | IGLV3-19   |
| IGLV3-21  | IGLV3-22  | IGLV3-25    | IGLV3-27  | IGLV3-32  | IGLV3-9    |
| IGLV4-3   | IGLV4-60  | IGLV4-69    | IGLV5-37  | IGLV5-45  | IGLV5-48   |
| IGLV5-52  | IGLV6-57  | IGLV7-43    | IGLV7-46  | IGLV8-61  | IGLV9-49   |
| TRAC      | TRAJ1     | TRAJ10      | TRAJ11    | TRAJ12    | TRAJ13     |
| TRAJ14    | TRAJ16    | TRAJ17      | TRAJ18    | TRAJ19    | TRAJ2      |
| TRAJ20    | TRAJ21    | TRAJ22      | TRAJ23    | TRAJ24    | TRAJ25     |
| TRAJ26    | TRAJ27    | TRAJ28      | TRAJ29    | TRAJ3     | TRAJ30     |
| TRAJ31    | TRAJ32    | TRAJ33      | TRAJ34    | TRAJ35    | TRAJ36     |
| TRAJ37    | TRAJ38    | TRAJ39      | TRAJ4     | TRAJ40    | TRAJ41     |
| TRAJ42    | TRAJ43    | TRAJ44      | TRAJ45    | TRAJ46    | TRAJ47     |
| TRAJ48    | TRAJ49    | TRAJ5       | TRAJ50    | TRAJ52    | TRAJ53     |
| TRAJ54    | TRAJ56    | TRAJ57      | TRAJ58    | TRAJ59    | TRAJ6      |
| TRAJ61    | TRAJ7     | TRAJ9       | TRAV1-1   | TRAV1-2   | TRAV10     |
| TRAV12-1  | TRAV12-2  | TRAV12-3    | TRAV13-1  | TRAV13-2  | TRAV14DV4  |
| TRAV16    | TRAV17    | TRAV18      | TRAV19    | TRAV2     | TRAV20     |
| TRAV21    | TRAV22    | TRAV23DV6   | TRAV24    | TRAV25    | TRAV26-1   |
| TRAV26-2  | TRAV27    | TRAV29DV5   | TRAV3     | TRAV30    | TRAV34     |
| TRAV36DV7 | TRAV38-1  | TRAV38-2DV  | TRAV39    | TRAV4     | TRAV40     |
| TRAV41    | TRAV5     | TRAV6       | TRAV7     | TRAV8-1   | TRAV8-2    |
| TRAV8-3   | TRAV8-4   | TRAV8-6     | TRAV8-7   | TRAV9-1   | TRAV9-2    |
| TRBC1     | TRBC2     | TRBJ1-1     | TRBJ1-2   | TRBJ1-3   | TRBJ1-4    |
| TRBJ1-5   | TRBJ1-6   | TRBJ2-1     | TRBJ2-2   | TRBJ2-3   | TRBJ2-4    |
| TRBJ2-5   | TRBJ2-6   | TRBJ2-7     | TRBV10-1  | TRBV10-2  | TRBV10-3   |
| TRBV11-1  | TRBV11-2  | TRBV11-3    | TRBV12-3  | TRBV12-4  | TRBV12-5   |
| TRBV13    | TRBV14    | TRBV15      | TRBV16    | TRBV17    | TRBV18     |
| TRBV19    | TRBV2     | TRBV20-1    | TRBV23-1  | TRBV24-1  | TRBV25-1   |
| TRBV27    | TRBV28    | TRBV29-1    | TRBV3-1   | TRBV30    | TRBV4-1    |
| TRBV4-2   | TRBV5-1   | TRBV5-3     | TRBV5-4   | TRBV5-5   | TRBV5-6    |
| TRBV5-7   | TRBV6-1   | TRBV6-2     | TRBV6-4   | TRBV6-5   | TRBV6-6    |
| TRBV6-7   | TRBV6-8   | TRBV7-1     | TRBV7-2   | TRBV7-3   | TRBV7-4    |
| TRBV7-6   | TRBV7-7   | TRBV7-9     | TRBV9     | TRDC      | TRDD2      |
| TRDJ1     | TRDJ2     | TRDJ3       | TRDJ4     | TRDV1     | TRDV2      |
| TRDV3     | TRGC1     | TRGC2       | TRGJ1     | TRGJ2     | TRGJP      |
| TRGJP1    | TRGJP2    | TRGV10      | TRGV11    | TRGV2     | TRGV3      |
| TRGV4     | TRGV5     | TRGV8       | TRGV9     |           |            |

**Supplementary Table 8.** List of samples, chemistries, flowcell identification numbers, and manufacturer software versions.

| Sample     | Flowcell ID | Flowcell Chemistry | Kit                | Albacore |
|------------|-------------|--------------------|--------------------|----------|
| Tumour     | FAH59175    | FLO-MIN106         | SQK-LSK108         | 2.2.7    |
|            | FAH63491    |                    |                    |          |
|            | FAH77585    |                    |                    |          |
|            | FAH77358    |                    |                    | 2.1.3    |
|            | FAH53149    |                    |                    |          |
|            | FAH53149    |                    |                    |          |
|            | FAH89946    |                    |                    |          |
| Lymph Node | FAH59253    | FLO-MIN106         | SQK-LSK108         | 2.2.7    |
|            | FAH60789    |                    |                    |          |
|            | FAH77356    |                    |                    |          |
|            | FAH82913    |                    |                    | 2.1.3    |
|            | FAH52286    |                    |                    |          |
|            | FAH52286    |                    |                    |          |
|            | FAH86252    |                    |                    |          |
| FAH82560   |             |                    |                    |          |
| Cell lines | FAH58575    | FLO-MIN106         | SQK-LSK108         | 2.2.7    |
|            | FAH58565    |                    |                    |          |
|            | FAH60746    |                    |                    |          |
|            | FAH84424    |                    |                    |          |
|            | FAH04597    | FLO-MIN107         | SQK-LSK308 (as 1D) | 2.1.3    |
|            | FAH04593    |                    |                    |          |
|            | FAH30303    |                    |                    |          |
