# Supplementary material for: High-throughput targeted long-read single cell sequencing reveals the clonal and transcriptional landscape of lymphocytes
Source: PubMed Central journal article supplement (PMC6635368; doi:10.1038/s41467-019-11049-4), 2019-07-16
Supplement: 41467_2019_11049_MOESM3_ESM.pdf [file 41467_2019_11049_MOESM3_ESM.pdf]

## **Description of Additional Supplementary Files**

File Name: Supplementary Data 1

Description: Assignment of unique V(D)J chains to lymph node and tumor.
